# Supplementary material for: Iron and vanadium containing molybdophosphoric acid catalyst for selective oxidation of alcohols with molecular oxygen
Source: Royal Society of Chemistry journal article supplement (doi:10.1039/b618546k), 2007-01-01
Supplement: b618546k.pdf [file b618546k.pdf]

**Supplementary Information:****Table 4. Elemental analysis of fresh catalysts.**

| Catalyst            | Metals analyzed | amount taken for preparation (mmol/g) | Actual amount present in catalyst as measured by ICP-MS (mmol/g) |
|---------------------|-----------------|---------------------------------------|------------------------------------------------------------------|
| MPAV <sub>1</sub>   | V, Mo           | 0.43, 5.83                            | 0.40, 4.47                                                       |
| FeMPA               | Fe              | 0.52                                  | 0.339                                                            |
| FeMPAV <sub>1</sub> | Fe, V, Mo       | 0.52, 0.43, 5.83                      | 0.30, 0.412, 4.47                                                |

**Table 5. Elemental analysis of recycled catalysts.**

| Catalyst                    | Metals analyzed | Actual amount present as measured by ICP-MS (mmol/g) (Fe, V respectively) |
|-----------------------------|-----------------|---------------------------------------------------------------------------|
| FeMPAV <sub>1</sub> fresh   | Fe, V           | 0.30, 0.412                                                               |
| FeMPAV <sub>1</sub> cycle 1 | Fe, V           | 0.292, 0.405                                                              |
| FeMPAV <sub>1</sub> cycle 3 | Fe, V           | 0.285, 0.396                                                              |
